# Supplementary material for: Switchable regioselectivity in the PIFA–BF3·Et2O mediated oxidative coupling of meso-brominated Ni(ii) porphyrin
Source: Royal Society of Chemistry journal article supplement (doi:10.1039/c4ob01517g), 2014-01-01
Supplement: c4ob01517g1.pdf [file c4ob01517g1.pdf]

## Supporting Information for:

### Switchable regioselectivity in PIFA-BF<sub>3</sub>·Et<sub>2</sub>O mediated oxidative coupling of *meso*-brominated Ni(II) porphyrin

Chuan-Mi Feng, Yi-Zhou Zhu,\* Yun Zang, Yu-Zhang Tong and Jian-Yu Zheng\*

State Key Laboratory and Institute of Elemento-organic Chemistry, Collaborative Innovation  
Center of Chemical Science and Engineering (Tianjin), Nankai University, Tianjin 300071, China

zhuyizhou@nankai.edu.cn; jy Zheng@nankai.edu.cn

|                                                                                                                                 |     |
|---------------------------------------------------------------------------------------------------------------------------------|-----|
| 1. Instrumentations and Materials.....                                                                                          | S2  |
| 2. Optimization of the oxidative coupling.....                                                                                  | S2  |
| 3. The absorption spectra of various linked porphyrin dimers.....                                                               | S3  |
| 4. The Procedure for the Synthesis of Singly Linked Porphyrin Dimers.....                                                       | S3  |
| 5. The Procedure for the Synthesis of <i>meso</i> - $\beta$ , <i>meso</i> - $\beta$ Doubly Fused Dimer.....                     | S4  |
| 6. The Procedure for the Synthesis of <i>meso</i> - <i>meso</i> , $\beta$ - $\beta$ Doubly Fused Dimer.....                     | S5  |
| 7. The Procedure for the Synthesis of $\beta$ - $\beta$ , <i>meso</i> - <i>meso</i> , $\beta$ - $\beta$ Triply Fused Dimer..... | S5  |
| 8. S <sub>N</sub> Ar reaction of <b>2</b> .....                                                                                 | S6  |
| 9. Demetalation of <b>2</b> , <b>3</b> and <b>6</b> .....                                                                       | S6  |
| 10. NMR Spectra of Directly Linked Porphyrin Dimers.....                                                                        | S8  |
| 11. Crystal Data for <b>2</b> .....                                                                                             | S18 |

## 1. Instrumentations and Materials

All NMR solvents were used as received. Chemical shifts of NMR spectra were reported in ppm down field from internal Me<sub>4</sub>Si. Crystal data were collected with a Agilent Technologies SuperNov a single-crystal diffractometer using a confocal monochromator with Mo K $\alpha$  radiation (0.71073 Å) at 273 K. All UV-vis absorption spectra were recorded using a UV-3600 UV-Vis-NIR spectrophotometer (Shimadzu, Japan). High-resolution mass spectra (HRMS) were recorded on a VG ZAB-HS mass spectrometer under electron spray ionization (ESI) and a Bruker ultra fleXtreme MALDI-TOF/TOF spectrometer. All of the solvents were purified and distilled according to the standard procedure. The commercially obtained materials were used directly without further purification unless otherwise noted. PIFA (98%) and BF<sub>3</sub>·Et<sub>2</sub>O (98%) were purchased from Aldrich.

## 2. Optimization of the oxidative coupling

**Table 1** Condition Screening of Oxidative Coupling of **1** with PIFA-BF<sub>3</sub>·Et<sub>2</sub>O<sup>a</sup>

| entry          | 1/BF <sub>3</sub> ·Et <sub>2</sub> O/PIFA (equiv) | yield <sup>b</sup> (%) |       |    | time   |
|----------------|---------------------------------------------------|------------------------|-------|----|--------|
|                |                                                   | 2                      | 3     | 4  |        |
| 1              | 1:0:0.5                                           | 0                      | 0     | 90 | 1 h    |
| 2 <sup>c</sup> | 1:1:0                                             | 0                      | 0     | 0  | 2 h    |
| 3              | 1:1:0.5                                           | 80                     | trace | 0  | 30 min |
| 4              | 1:1:0.75                                          | 54                     | 25    | 0  | 30 min |
| 5              | 1:1:1                                             | 0                      | 75    | 0  | 30 min |
| 6              | 1:1:1.5                                           | 0                      | 68    | 0  | 30 min |
| 7              | 1:0.5:0.5                                         | 80                     | trace | 0  | 30 min |
| 8              | 1:0.2:0.5                                         | 80                     | trace | 0  | 1.5 h  |
| 9              | 1:0.5:1.0                                         | 0                      | 75    | 0  | 30 min |

<sup>a</sup>To the stirred mixture of **1** and BF<sub>3</sub>·Et<sub>2</sub>O in CH<sub>2</sub>Cl<sub>2</sub> was added dropwise a solution of PIFA in dry CH<sub>2</sub>Cl<sub>2</sub> over 20 min under a nitrogen atmosphere. <sup>b</sup>Isolated yield. <sup>c</sup>Compound **1** was recovered.

**Table S2.** Reaction Conditions for Synthesizing Doubly and Triply Linked Porphyrin Dimers **5** and **6**

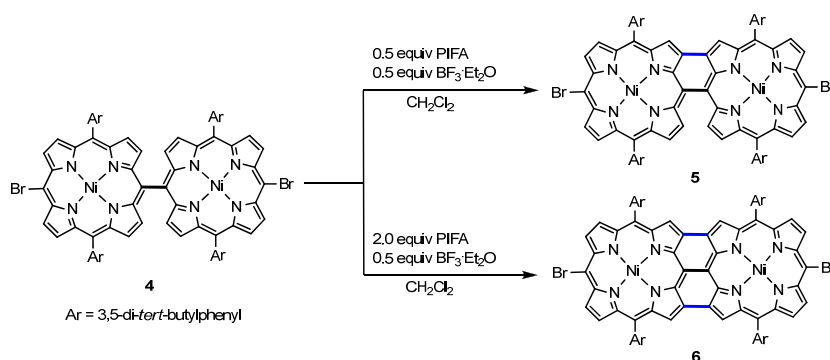

| entry | 4/PIFA/BF <sub>3</sub> Et <sub>2</sub> O (equiv) | yield <sup>a</sup> (%) |    |
|-------|--------------------------------------------------|------------------------|----|
|       |                                                  | 5                      | 6  |
| 1     | 1:0.5:0.5                                        | 93                     | 0  |
| 2     | 1:1:0.5                                          | 65                     | 30 |
| 3     | 1:2:0.5                                          | 0                      | 90 |
| 4     | 1:2.5:0.5                                        | 0                      | 85 |

To a stirred solution of **4** in dry CH<sub>2</sub>Cl<sub>2</sub> was added PIFA and BF<sub>3</sub>Et<sub>2</sub>O under a nitrogen atmosphere. <sup>a</sup>Isolated yield.

### 3. The absorption spectra of various linked Ni(II) porphyrin dimer

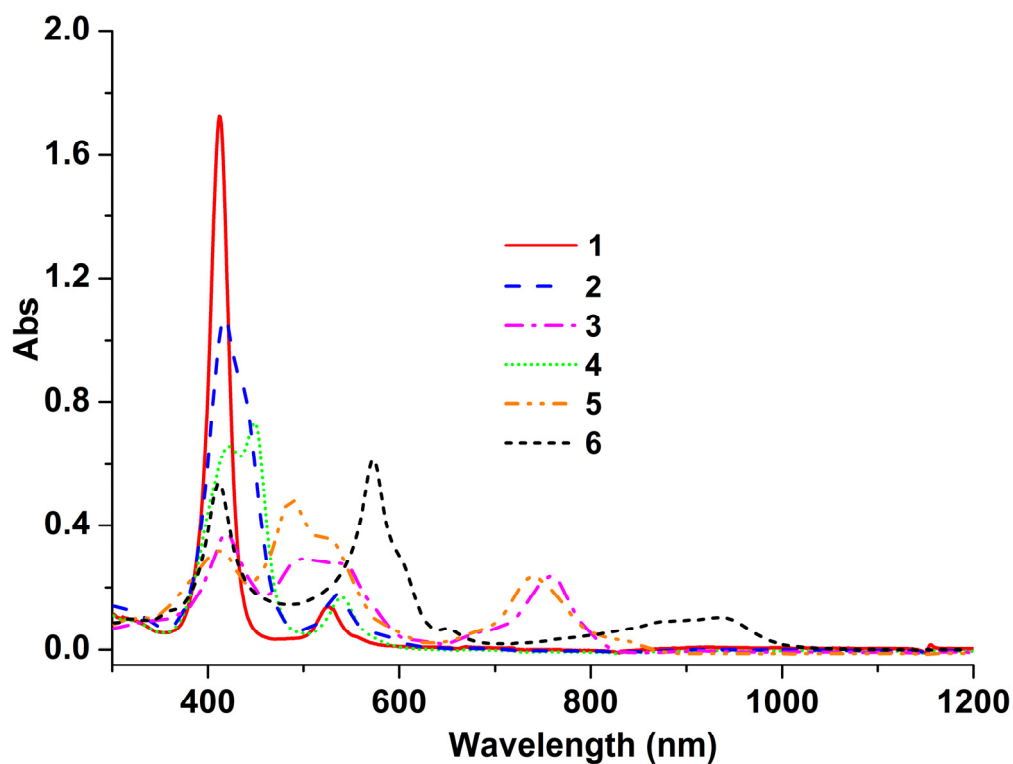

**Fig. S1.** Ultraviolet-visible-infrared absorption spectra of fused porphyrin dimer **1** (red), **2** (blue), **3** (pink), **4** (green), **5** (yellow) and **6** (black) in CHCl<sub>3</sub>.

### 4. The Procedure for the Synthesis of Singly Linked Porphyrin Dimers

For the *meso*- $\beta$  linked **2**

Under the nitrogen atmosphere, to a stirred solution of **1** (49 mg, 0.06 mmol) and BF<sub>3</sub>Et<sub>2</sub>O (4 mg, 0.03 mmol, 0.5 equiv) in dry CH<sub>2</sub>Cl<sub>2</sub> (50 mL) was added dropwise a solution of PIFA (13 mg, 0.03 mmol, 0.5 equiv) in dry CH<sub>2</sub>Cl<sub>2</sub> (10 mL) over 20 min at RT. The reaction mixture was stirred for additional 10 min at the same temperature. Et<sub>3</sub>N (0.2 mL) was added to the reaction mixture. The reaction mixture was poured into water and extracted with CHCl<sub>3</sub>, then washed with saturated sodium bicarbonate aqueous solution twice. The combined extract was dried over anhydrous

Na<sub>2</sub>SO<sub>4</sub> and then evaporated to dryness. The crude residue was purified by column chromatography (silica-gel). **2** (39 mg, 80%) was obtained after recrystallization from CHCl<sub>3</sub>/CH<sub>3</sub>OH.

<sup>1</sup>H NMR (400 MHz, CDCl<sub>3</sub>, RT): δ = 9.66 (d, *J* = 5.0 Hz, 1H), 9.63 (s, 1H), 9.60 – 9.56 (m, 3H), 9.07 – 9.04 (m, 2H), 8.91 – 8.86 (m, 3H), 8.76 (d, *J* = 5.0 Hz, 2H), 8.66 (bs, 3H), 8.46 (d, *J* = 4.8 Hz, 1H), 8.10 (d, *J* = 1.7 Hz, 2H), 7.80 (d, *J* = 1.7 Hz, 2H), 7.71 – 7.68 (m, 4H), 1.48 – 1.40 (m, 72H).

<sup>1</sup>H NMR (400 MHz, CDCl<sub>3</sub>, -40°C): δ = 9.66 (s, 1H), 9.68 (d, *J* = 5.0 Hz, 1H), 9.62 – 9.58 (m, 3H), 9.14 (d, *J* = 5.0 Hz, 1H), 9.01 (s, 1H), 8.96 (d, *J* = 5.0 Hz, 2H), 8.92 (d, *J* = 5.0 Hz, 1H), 8.80 (d, *J* = 5.0 Hz, 2H), 8.73 – 8.67 (m, 3H), 8.47 (d, *J* = 4.8 Hz, 1H), 8.17 – 8.12 (m, 4H), 7.80 (d, *J* = 1.8 Hz, 2H), 7.71 (bs, 1H), 7.69 (s, 3H), 7.59 (s, 2H), 1.51 – 1.46 (m, 32H), 1.44 (s, 18H), 1.40 (s, 18H).

<sup>13</sup>C NMR (100 MHz, CDCl<sub>3</sub>, RT): δ = 149.24, 149.09, 149.04, 145.90, 144.42, 143.90, 143.85, 143.78, 143.62, 143.56, 143.34, 143.05, 142.43, 142.38, 142.24, 141.38, 139.55, 139.35, 137.88, 133.72, 133.68, 133.64, 133.20, 133.16, 133.12, 133.07, 132.52, 129.27, 128.90, 128.74, 121.46, 121.32, 121.21, 121.12, 120.54, 112.16, 106.74, 102.76, 102.66, 35.00, 34.96, 31.67, 31.62.

HRMS (ESI) *m/z* [M]<sup>+</sup> calcd. for C<sub>96</sub>H<sub>100</sub>Br<sub>2</sub>N<sub>8</sub>Ni<sub>2</sub>: 1642.5080, found 1642.5073; Ultraviolet-visible absorption : (in CHCl<sub>3</sub>, λ<sub>max</sub>/nm, ε/mol<sup>-1</sup>dm<sup>3</sup>cm<sup>-1</sup>): 417 (2.14 × 10<sup>5</sup>), 431 (1.80 × 10<sup>5</sup>), 534 (3.57 × 10<sup>4</sup>).

#### For the *meso-meso* linked **4**

Under the nitrogen atmosphere, to a stirred solution of **1** (49 mg, 0.06 mmol) in dry CH<sub>2</sub>Cl<sub>2</sub> (50 mL) was added dropwise a solution of PIFA (13 mg, 0.03 mmol, 0.5 equiv) in dry CH<sub>2</sub>Cl<sub>2</sub> (10 mL) over 20 min at RT. The reaction mixture was stirred for additional 50 min at the same temperature. Et<sub>3</sub>N (0.2 mL) was added to the reaction mixture. The reaction mixture was poured into water and extracted with CHCl<sub>3</sub>, then washed with saturated sodium bicarbonate aqueous solution twice. The combined extract was dried over anhydrous Na<sub>2</sub>SO<sub>4</sub> and then evaporated to dryness. The crude residue was purified by column chromatography (silica-gel). **4** (44 mg, 90%) was obtained after recrystallization from CHCl<sub>3</sub>/CH<sub>3</sub>OH.

<sup>1</sup>H NMR (400 MHz, CDCl<sub>3</sub>, RT): δ = 9.58 (d, *J* = 5.0 Hz, 4 H), 8.85 (d, *J* = 5.0 Hz, 4 H), 8.53 (d, *J* = 5.0 Hz, 4 H), 8.02 (d, *J* = 5.0 Hz, 4 H), 7.83 (d, *J* = 1.6 Hz, 8 H), 7.66 (s, 4 H), 1.41 (s, 72 H).

<sup>13</sup>C NMR (100 MHz, CDCl<sub>3</sub>, RT): δ = 149.00, 146.84, 143.95, 142.72, 142.26, 139.41, 134.08, 133.54, 133.10, 133.00, 128.71, 121.62, 121.30, 115.83, 102.97, 34.94, 31.60.

HRMS (MALDI) *m/z* [M+H]<sup>+</sup> calcd. for C<sub>96</sub>H<sub>100</sub>Br<sub>2</sub>N<sub>8</sub>Ni<sub>2</sub>: 1643.5158, found 1643.5175; Ultraviolet-visible absorption : (in CHCl<sub>3</sub>, λ<sub>max</sub>/nm, ε/mol<sup>-1</sup>dm<sup>3</sup>cm<sup>-1</sup>): 421 (1.64 × 10<sup>5</sup>), 449 (1.84 × 10<sup>5</sup>), 539 (4.20 × 10<sup>4</sup>).

## 5. The Procedure for the Synthesis of *meso-β*, *meso-β* Doubly Fused Dimer

Under the nitrogen atmosphere, to a stirred solution of **1** (49 mg, 0.06 mmol) and BF<sub>3</sub>·Et<sub>2</sub>O (4 mg, 0.03 mmol, 0.5 equiv) in dry CH<sub>2</sub>Cl<sub>2</sub> (40 mL) was added dropwise a solution of PIFA (26 mg, 0.06 mmol, 1 equiv) in dry CH<sub>2</sub>Cl<sub>2</sub> (10 mL) over 20 min at RT. The reaction mixture was stirred for additional 10 min at the same temperature. Et<sub>3</sub>N (0.2 mL) was added to the reaction mixture. The reaction mixture was poured into water and extracted with CHCl<sub>3</sub>, then washed with saturated sodium bicarbonate aqueous solution twice. The combined extract was dried over anhydrous Na<sub>2</sub>SO<sub>4</sub> and then evaporated to dryness. The crude residue was purified by column chromatography (silica-gel). **3** (37 mg, 75%) was obtained after recrystallization from CHCl<sub>3</sub>/CH<sub>3</sub>OH.

<sup>1</sup>H NMR (400 MHz, CDCl<sub>3</sub>, RT): δ = 9.41 (s, 2H), 9.12 – 9.11 (m, 4H), 8.96 (s, 2H), 8.74 (d, *J* = 3.8 Hz, 2H), 8.44 (d, *J* = 5.0 Hz, 2H), 8.39 (d, *J* = 4.8 Hz, 2H), 7.91 (s, 4H), 7.84 – 7.65 (m, 8H), 1.54 (s, 36H), 1.51 (s, 36H).

$^{13}\text{C}$  NMR (100 MHz,  $\text{CDCl}_3$ , RT):  $\delta = 149.44, 149.41, 144.68, 144.61, 143.45, 143.37, 143.31, 142.84, 142.39, 142.11, 140.22, 138.83, 138.61, 134.96, 134.00, 133.70, 133.21, 132.91, 132.41, 132.27, 128.90, 128.55, 123.15, 122.55, 121.66, 121.43, 110.10, 104.24, 35.09, 35.04, 31.73, 31.68$ .

HRMS (ESI)  $m/z$   $[\text{M}]^+$  calcd. for  $\text{C}_{96}\text{H}_{98}\text{Br}_2\text{N}_8\text{Ni}_2$ : 1640.4924, found 1640.4943; Ultraviolet-visible-infrared absorption: (in  $\text{CHCl}_3$ ,  $\lambda_{\text{max}}/\text{nm}$ ,  $\epsilon/\text{mol}^{-1}\text{dm}^3\text{cm}^{-1}$ ): 419 ( $0.76 \times 10^5$ ), 498 ( $0.59 \times 10^5$ ), 533 ( $0.56 \times 10^5$ ), 684 ( $1.16 \times 10^4$ ), 758 ( $4.66 \times 10^4$ ).

## 6. The Procedure for the Synthesis of *meso-meso*, $\beta\text{-}\beta$ Doubly Fused Dimer

Under the nitrogen atmosphere, a solution of **1** (49 mg, 0.06 mmol) and PIFA (26 mg, 0.06 mmol, 1 equiv) in dry  $\text{CH}_2\text{Cl}_2$  (50 mL) was stirred at RT for 1 h. When the porphyrin monomer was completely consumed,  $\text{BF}_3\cdot\text{Et}_2\text{O}$  (4 mg, 0.03 mmol, 0.5 equiv) was added to the mixture. The mixture was stirred for additional 10 min at the same temperature.  $\text{Et}_3\text{N}$  (0.2 mL) was added to the reaction mixture. The reaction mixture was poured into water and extracted with  $\text{CHCl}_3$ , then washed with saturated sodium bicarbonate aqueous solution twice. The combined extract was dried over anhydrous  $\text{Na}_2\text{SO}_4$  and then evaporated to dryness. The crude residue was purified by column chromatography (silica-gel). **5** (41 mg, 84%) was obtained after recrystallization from  $\text{CHCl}_3/\text{CH}_3\text{OH}$ .

$^1\text{H}$  NMR (400 MHz,  $\text{CDCl}_3$ , RT):  $\delta = 9.21$  (d,  $J = 5.0$  Hz, 2H), 9.16 (d,  $J = 4.9$  Hz, 2H), 8.78 (s, 2H), 8.55 – 8.51 (m, 2H), 8.48 (d,  $J = 5.0$  Hz, 4H), 7.76 (bs, 2H), 7.64 (bs, 2H), 7.46 (d,  $J = 5.1$  Hz, 2H), 1.70 – 1.20 (m, 72 H).

$^1\text{H}$  NMR (400 MHz,  $\text{CDCl}_3$ ,  $-40^\circ\text{C}$ ):  $\delta = 9.23$  (d,  $J = 5.0$  Hz, 2H), 9.18 (d,  $J = 4.9$  Hz, 2H), 8.84 (s, 2H), 8.61 (d,  $J = 4.9$  Hz, 2H), 8.59 (d,  $J = 5.0$  Hz, 2H), 8.57 (d,  $J = 5.0$  Hz, 2H), 8.54 – 8.50 (m, 4H), 7.74 (bs, 2H), 7.63 (bs, 2H), 7.48 (d,  $J = 5.1$  Hz, 2H), 7.15 (s, 2H), 6.98 (s, 2H), 1.67 (s, 18H), 1.64 (s, 18H), 1.35 (s, 18H), 1.22 (s, 18H).

$^{13}\text{C}$  NMR (100 MHz,  $\text{CDCl}_3$ , RT):  $\delta = 149.39, 145.98, 144.82, 143.85, 142.98, 142.51, 142.13, 141.88, 139.67, 139.64, 138.68, 137.77, 137.69, 137.49, 133.53, 133.44, 133.40, 133.26, 132.36, 128.68, 128.46, 126.49, 124.04, 121.55, 121.42, 120.40, 113.23, 103.98, 35.03, 34.98, 31.70, 31.60$ .

HRMS (ESI)  $m/z$   $[\text{M}]^+$  calcd. for  $\text{C}_{96}\text{H}_{98}\text{Br}_2\text{N}_8\text{Ni}_2$ : 1640.4924, found 1640.4950; Ultraviolet-visible-infrared absorption: (in  $\text{CHCl}_3$ ,  $\lambda_{\text{max}}/\text{nm}$ ,  $\epsilon/\text{mol}^{-1}\text{dm}^3\text{cm}^{-1}$ ): 412 ( $0.63 \times 10^5$ ), 487 ( $0.96 \times 10^5$ ), 526 ( $0.72 \times 10^5$ ), 738 ( $4.07 \times 10^4$ ).

## 7. The Procedure for the Synthesis of $\beta\text{-}\beta$ , *meso-meso*, $\beta\text{-}\beta$ Triply Fused Dimer

Under the nitrogen atmosphere, a solution of **1** (49 mg, 0.06 mmol) and PIFA (65 mg, 0.15 mmol, 2.5 equiv) in dry  $\text{CH}_2\text{Cl}_2$  (50 mL) was stirred at RT for 1 h. When porphyrin monomer was completely consumed,  $\text{BF}_3\cdot\text{Et}_2\text{O}$  (4mg, 0.03mmol, 0.5 equiv) was added to mixture. The mixture was stirred for additional 10 min at the same temperature.  $\text{Et}_3\text{N}$  (0.2 mL) was added to the reaction mixture. The reaction mixture was poured into water and extracted with  $\text{CHCl}_3$ , then washed with saturated sodium bicarbonate aqueous solution twice. The combined extract was dried over anhydrous  $\text{Na}_2\text{SO}_4$  and then evaporated to dryness. The crude residue was purified by column chromatography (silica-gel). **6** (39 mg, 80%) was obtained after recrystallization from  $\text{CHCl}_3/\text{petroleum ether}$ .

$^1\text{H}$  NMR (400 MHz,  $V_{\text{CDCl}_3}/V_{\text{CS}_2} = 4:1$ , RT):  $\delta = 8.52$  (d,  $J = 4.9$  Hz, 4H), 7.77 (d,  $J = 4.9$  Hz, 4H), 7.60 (s, 4H), 7.54 (s, 8H), 7.47 (s, 4H), 1.43 (s, 72H).

$^{13}\text{C}$  NMR (100 MHz,  $V_{\text{CDCl}_3}/V_{\text{CS}_2} = 4:1$ , RT):  $\delta = 149.15, 147.45, 146.53, 145.52, 145.47, 138.37, 134.76, 132.04, 131.70, 127.65, 127.49, 125.01, 121.40, 113.31, 107.89, 34.81, 31.59$ .

HRMS (ESI)  $m/z$   $[M]^+$  calcd. for  $C_{96}H_{96}Br_2N_8Ni_2$ : 1638.4767, found 1638.4787; Ultraviolet-visible-infrared absorption: (in  $CHCl_3$ ,  $\lambda_{max}/nm$ ,  $\epsilon/mol^{-1}dm^3cm^{-1}$ ): 411 ( $1.58 \times 10^5$ ), 572 ( $1.23 \times 10^5$ ), 651 ( $1.13 \times 10^4$ ), 864 ( $1.72 \times 10^4$ ), 937 ( $2.10 \times 10^4$ ).

## 8. $S_NAr$ reaction of **2**

**2** (40 mg, 0.02 mmol),  $Cs_2CO_3$  (33 mg, 0.10 mmol, 5 equiv) and phenol (9 mg, 0.10 mmol, 5 equiv) were added to a 25 mL two-necked round bottom flask, then the flask was evacuated and backfilled with  $N_2$  for 3 times. DMF (5 mL) was added using a syringe, then the reaction was heated to  $100^\circ C$ . The solution was continuously stirred at the temperature for 1.5 h. When compound **2** was completely consumed, the mixture was cooled down to room temperature, and water (5.0 mL) was added to precipitate the product. **8** (33 mg, 81%) was obtained after recrystallization from  $CHCl_3/CH_3OH$ .

$^1H$  NMR (400 MHz,  $CDCl_3$ , RT):  $\delta$  = 9.69 (s, 1H), 9.36 (d,  $J$  = 4.9 Hz, 1H), 9.31 – 9.27 (m, 3H), 9.10 (s, 1H), 9.02 (d,  $J$  = 4.9 Hz, 1H), 8.88 – 8.78 (m, 5H), 8.70 – 8.66 (m, 3H), 8.48 (d,  $J$  = 4.8 Hz, 1H), 8.16 – 8.08 (m, 4H), 7.83 (d,  $J$  = 1.7 Hz, 2H), 7.72 – 7.60 (m, 4H), 7.24 – 7.19 (m, 2H), 7.01 (t,  $J$  = 7.3 Hz, 2H), 6.95 (t,  $J$  = 7.5 Hz, 4H), 1.48 – 1.40 (m, 72H).

$^{13}C$  NMR (100 MHz,  $CDCl_3$ , RT):  $\delta$  = 164.39, 164.33, 164.18, 149.21, 149.06, 149.01, 146.27, 144.70, 143.88, 143.62, 143.40, 143.33, 143.31, 143.05, 143.02, 141.44, 139.85, 139.65, 139.63, 139.40, 139.37, 139.13, 137.95, 133.09, 132.97, 132.79, 132.69, 132.10, 132.00, 129.62, 129.30, 128.90, 128.76, 128.30, 128.13, 128.09, 121.80, 121.77, 121.36, 121.22, 120.99, 120.91, 120.35, 116.49, 111.63, 106.23, 35.01, 34.97, 31.69, 31.64.

HRMS (MALDI)  $m/z$   $[M]^+$  calcd. for  $C_{108}H_{110}O_2N_8Ni_2$ : 1667.7486, found 1667.7500; Ultraviolet-visible absorption: (in  $CHCl_3$ ,  $\lambda_{max}/nm$ ,  $\epsilon/mol^{-1}dm^3cm^{-1}$ ): 419 ( $2.19 \times 10^5$ ), 432 ( $2.03 \times 10^5$ ), 530 ( $4.20 \times 10^4$ ).

## 9. Demetalation of **2**, **3** and **6**

For *meso*- $\beta$  singly linked dimer **7**

Porphyrin dimer **2** (82 mg, 0.05 mmol) was dissolved in dry  $CH_2Cl_2$  (20 mL) in a 100 mL round-bottomed flask. The solution was cooled to  $-10^\circ C$ , and then treated with 0.5 mL of  $H_2SO_4/TFA$  (1:10) 30 min. After neutralization by aqueous  $NaHCO_3$ , the solution was extracted with  $CH_2Cl_2$ , washed by brine, dried over anhydrous  $Na_2SO_4$ , and the solvent was removed under vacuum. The crude residue was purified by column chromatography (silica-gel). **7** (43 mg, 57%) was obtained after recrystallization from  $CHCl_3/CH_3OH$ .

$^1H$  NMR (400 MHz,  $CDCl_3$ , RT):  $\delta$  = 9.89 (d,  $J$  = 4.9 Hz, 1H), 9.81 – 9.74 (m, 4H), 9.70 (s, 1H), 9.24 (d,  $J$  = 4.9 Hz, 1H), 9.00 (d,  $J$  = 4.6 Hz, 2H), 8.97 (d,  $J$  = 4.8 Hz, 1H), 8.91 (d,  $J$  = 4.6 Hz, 2H), 8.81 (d,  $J$  = 4.7 Hz, 1H), 8.75 (d,  $J$  = 4.7 Hz, 2H), 8.65 (d,  $J$  = 4.7 Hz, 1H), 8.37 (d,  $J$  = 1.8 Hz, 2H), 8.14 (d,  $J$  = 1.4 Hz, 2H), 8.06 – 7.99 (4 H, m), 7.79 – 7.72 (4 m, 4 H), 1.51 – 1.49 (m, 36H), 1.49 – 1.47 (m, 36H), -2.30 (s, 2 H), -2.55 (s, 2 H).

$^{13}C$  NMR (100 MHz,  $CDCl_3$ , RT):  $\delta$  = 149.41, 149.39, 149.27, 149.25, 149.20, 149.02, 148.91, 148.87, 146.27, 144.33, 140.72, 140.43, 140.27, 138.73, 138.64, 133.91, 133.81, 132.41, 132.32, 132.09, 131.93, 131.67, 131.30, 131.02, 130.52, 130.47, 130.40, 129.97, 129.95, 129.85, 122.65, 122.43, 121.97, 121.44, 121.26, 113.64, 107.28, 103.66, 103.46, 35.05, 35.03, 31.72, 31.69.

HRMS (MALDI)  $m/z$   $[M+H]^+$  calcd. for  $C_{96}H_{104}Br_2N_8$ : 1529.6807, found 1529.6827; Ultraviolet-visible absorption: (in  $CHCl_3$ ,  $\lambda_{max}/nm$ ,  $\epsilon/mol^{-1}dm^3cm^{-1}$ ): 423 ( $3.12 \times 10^5$ ), 438 ( $2.65 \times 10^5$ ), 539 ( $4.40 \times 10^4$ ), 557 ( $2.50 \times 10^4$ ), 597 ( $1.75 \times 10^4$ ), 653 ( $12.5 \times 10^4$ ).

For fused dimers **H<sub>4</sub>-3** and **H<sub>4</sub>-6**

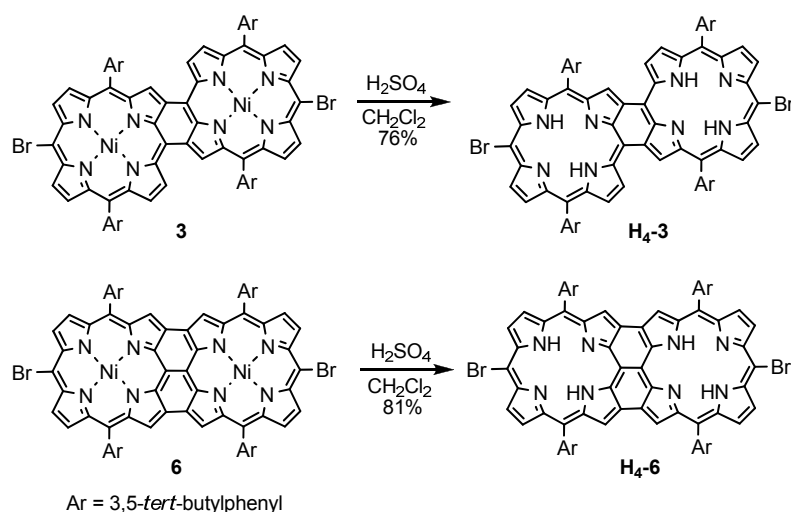

**Scheme S1.** Demetalation reaction of **3** and **6**

Porphyrin dimer **3** (50 mg, 0.03 mmol) was dissolved in dry CH<sub>2</sub>Cl<sub>2</sub> (20 mL) in a 50 mL round-bottomed flask. The solution was treated with concentrated H<sub>2</sub>SO<sub>4</sub> (0.1 mL) 30 min at RT. After neutralization by aqueous NaHCO<sub>3</sub>, the solution was extracted with CH<sub>2</sub>Cl<sub>2</sub>, washed by brine, dried over anhydrous Na<sub>2</sub>SO<sub>4</sub>, and the solvent was removed under vacuum. The crude residue was purified by column chromatography (silica-gel). **H<sub>4</sub>-3** (35 mg, 76%) was obtained after recrystallization from CHCl<sub>3</sub>/CH<sub>3</sub>OH.

**H<sub>4</sub>-3:**

<sup>1</sup>H NMR (400 MHz, CDCl<sub>3</sub>, RT): δ = 9.47 (d, *J* = 4.6 Hz, 2H), 9.26 – 9.20 (m, 4H), 9.10 (s, 2H), 8.62 – 8.56 (m, 4H), 8.49 (d, *J* = 4.8 Hz, 2H), 8.11 (d, *J* = 1.4 Hz, 4H), 7.98 (d, *J* = 1.4 Hz, 4H), 7.88 – 7.85 (m, 2H), 7.82 – 7.78 (m, 2H), 1.59 – 1.56 (m, 72H), 0.52 (s, 4H).

<sup>13</sup>C NMR (100 MHz, CDCl<sub>3</sub>, RT): δ = 149.33, 149.25, 147.07, 146.93, 146.10, 145.79, 145.26, 145.12, 144.51, 143.41, 143.23, 142.54, 142.31, 140.24, 140.04, 138.37, 137.65, 135.61, 135.50, 135.19, 129.98, 129.88, 124.96, 124.19, 121.62, 121.41, 105.43, 94.92, 35.17, 35.11, 31.83, 31.74.

HRMS (MALDI) *m/z* [M+H]<sup>+</sup> calcd. for C<sub>96</sub>H<sub>102</sub>Br<sub>2</sub>N<sub>8</sub>: 1527.6651, found 1527.6655; Ultraviolet-visible-infrared absorption : (in CHCl<sub>3</sub>, λ<sub>max</sub>/nm, ε/mol<sup>-1</sup>dm<sup>3</sup>cm<sup>-1</sup>): 425 (1.31 × 10<sup>5</sup>), 501 (6.70 × 10<sup>4</sup>), 545 (5.45 × 10<sup>4</sup>), 616 (4.35 × 10<sup>4</sup>), 821 (5.50 × 10<sup>4</sup>).

**H<sub>4</sub>-6:** Following the same procedure for demetalation of **3**.

<sup>1</sup>H NMR (400 MHz, V<sub>CDCl<sub>3</sub></sub>/V<sub>CS<sub>2</sub></sub> = 4:1, RT): δ = 8.46 – 8.38 (m, 6H), 7.65 – 7.63 (m, 6H), 7.61 – 7.57 (m, 12H), 1.46 – 1.42 (m, 76H)

<sup>13</sup>C NMR (100 MHz, V<sub>CDCl<sub>3</sub></sub>/V<sub>CS<sub>2</sub></sub> = 4:1, RT): δ = 148.94, 147.60, 146.65, 145.47, 145.45, 138.83, 133.97, 128.95, 128.18, 125.84, 125.81, 125.53, 121.33, 114.28, 107.83, 34.73, 31.57.

HRMS (MALDI) *m/z* [M+H]<sup>+</sup> calcd. for C<sub>96</sub>H<sub>100</sub>Br<sub>2</sub>N<sub>8</sub>: 1525.6494, found 1525.6508; Ultraviolet-visible-infrared absorption : (in CHCl<sub>3</sub>, λ<sub>max</sub>/nm, ε/mol<sup>-1</sup>dm<sup>3</sup>cm<sup>-1</sup>): 415 (1.19 × 10<sup>5</sup>), 482 (5.90 × 10<sup>4</sup>), 565 (1.24 × 10<sup>5</sup>), 1044 (2.73 × 10<sup>4</sup>), 1090 (3.07 × 10<sup>4</sup>).

## 10. NMR Spectra of Directly Linked Porphyrin Dimers

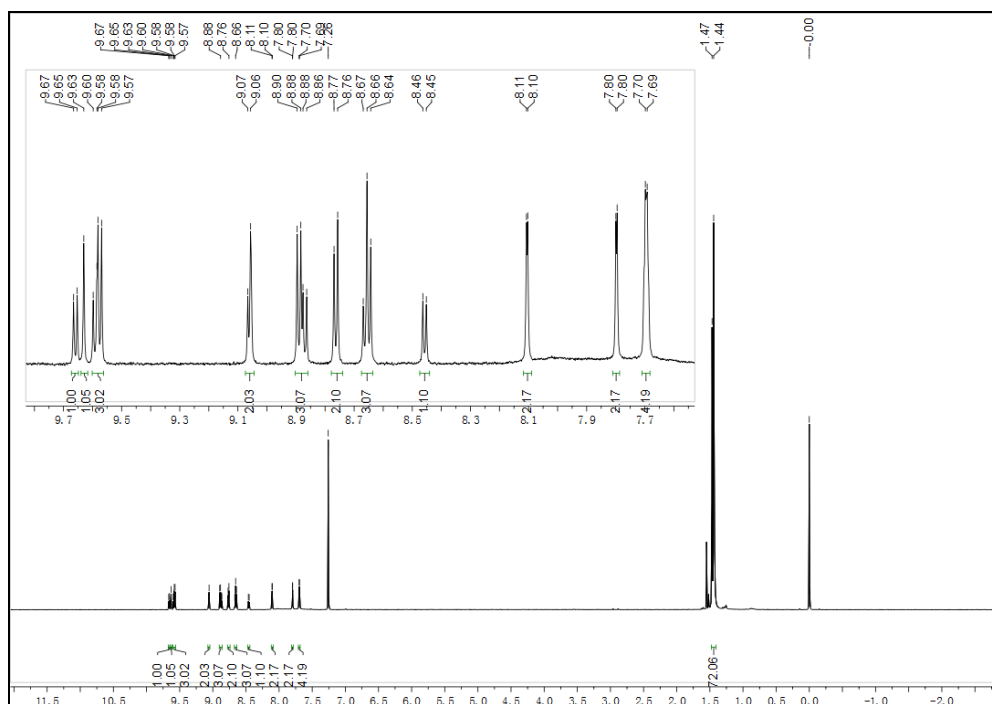



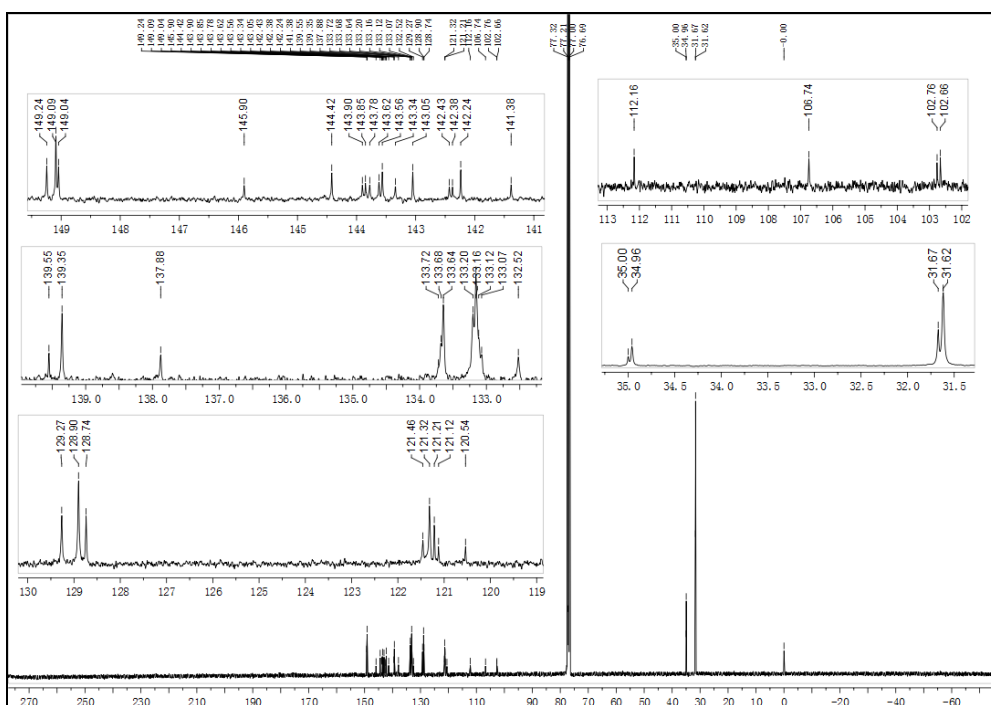

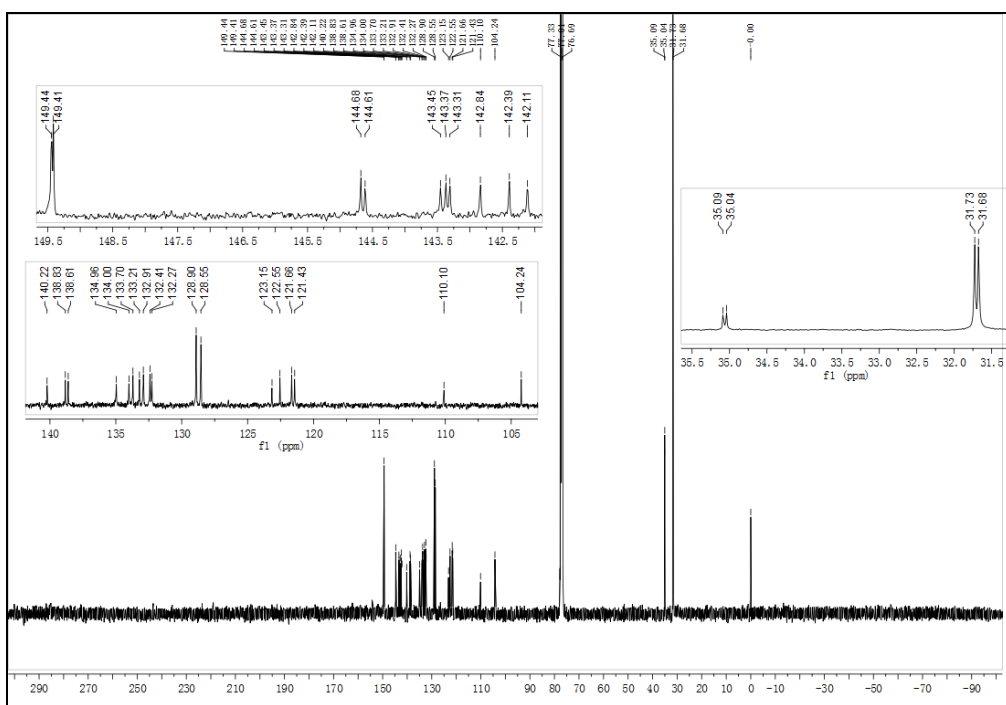

Figure S6.  $^{13}\text{C}$  NMR spectrum of **3** (100 MHz,  $\text{CDCl}_3$  at  $25^\circ\text{C}$ ).

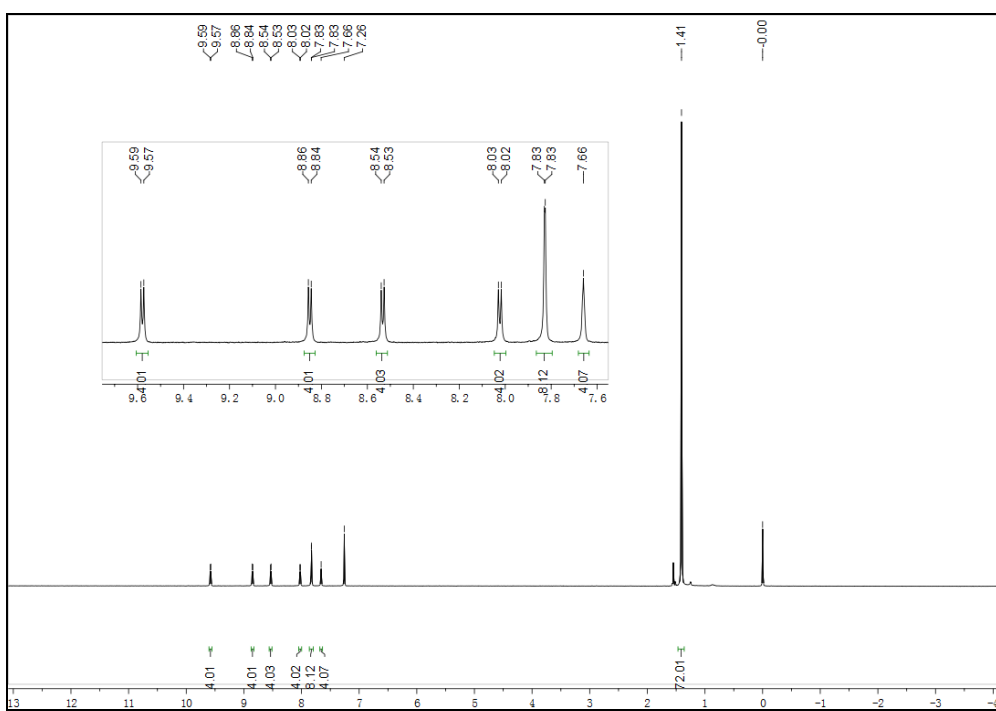

Figure S7.  $^1\text{H}$  NMR spectrum of **4** (400 MHz,  $\text{CDCl}_3$  at  $25^\circ\text{C}$ ).

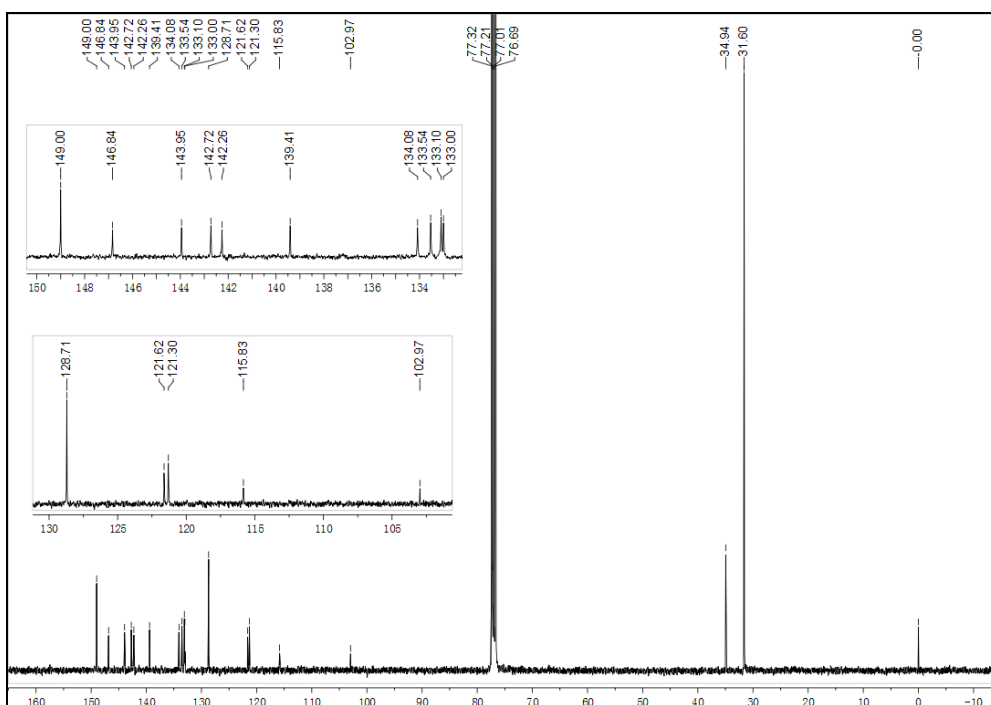

Figure S8.  $^{13}\text{C}$  NMR spectrum of **4** (100 MHz,  $\text{CDCl}_3$  at  $25^\circ\text{C}$ ).

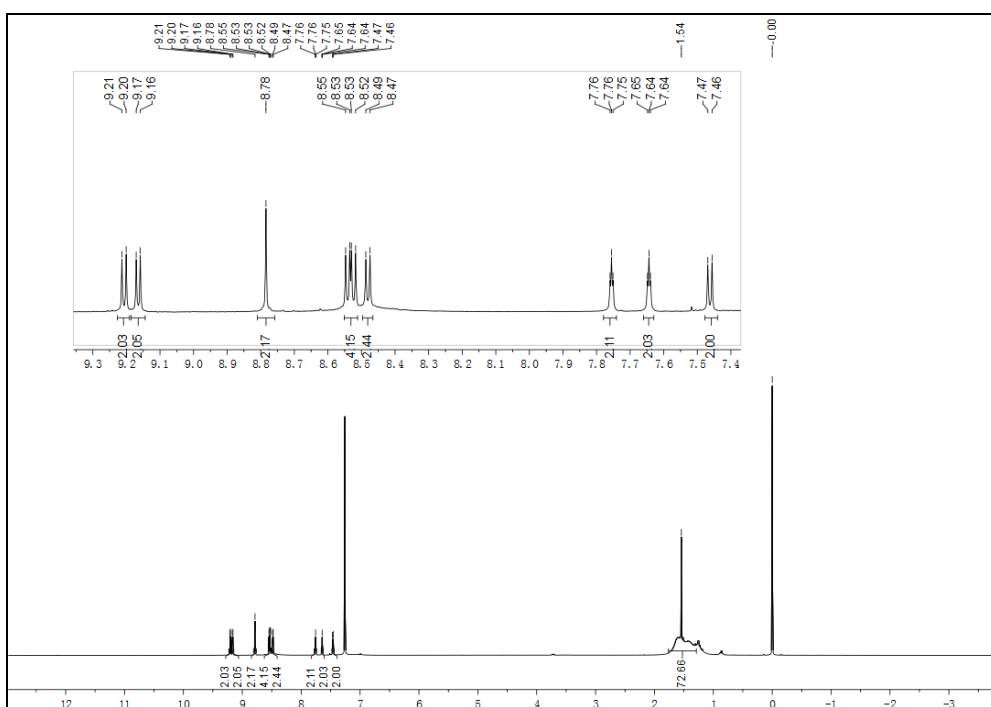

Figure S9.  $^1\text{H}$  NMR spectrum of **5** (400 MHz,  $\text{CDCl}_3$  at  $25^\circ\text{C}$ ).

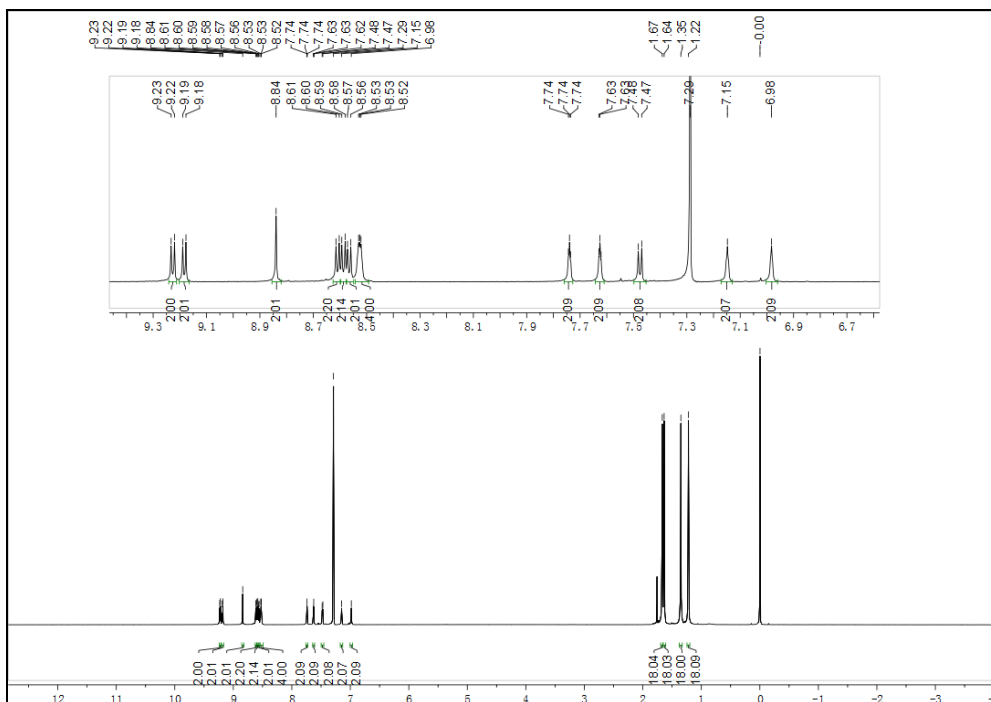

Figure S10. <sup>1</sup>H NMR spectrum of 5 (400 MHz, CDCl<sub>3</sub> at -40°C).

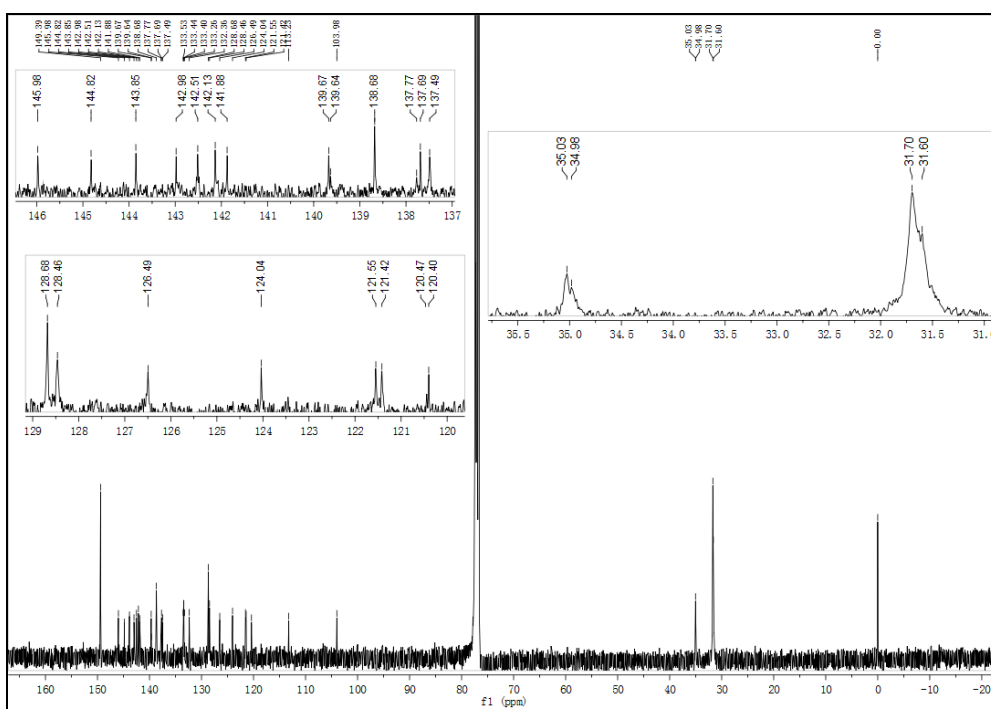

Figure S11. <sup>13</sup>C NMR spectrum of 5 (100 MHz, CDCl<sub>3</sub> at 25°C).

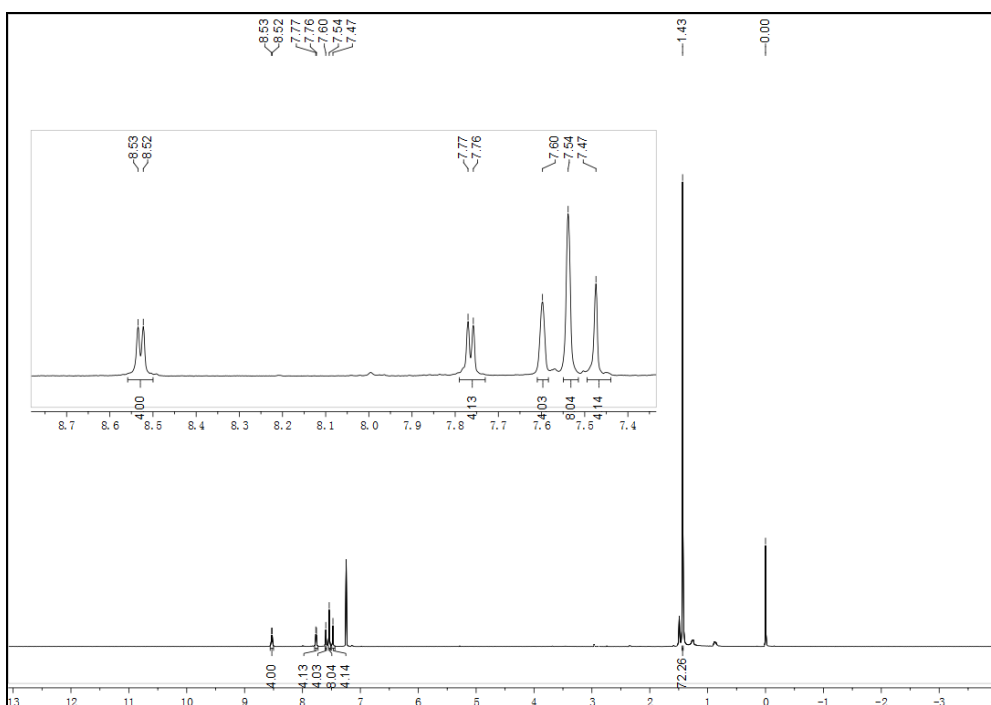

Figure S12.  $^1\text{H}$  NMR spectrum of **6** (400 MHz,  $V_{\text{CDCl}_3}/V_{\text{CS}_2} = 4:1$  at  $25^\circ\text{C}$ ).

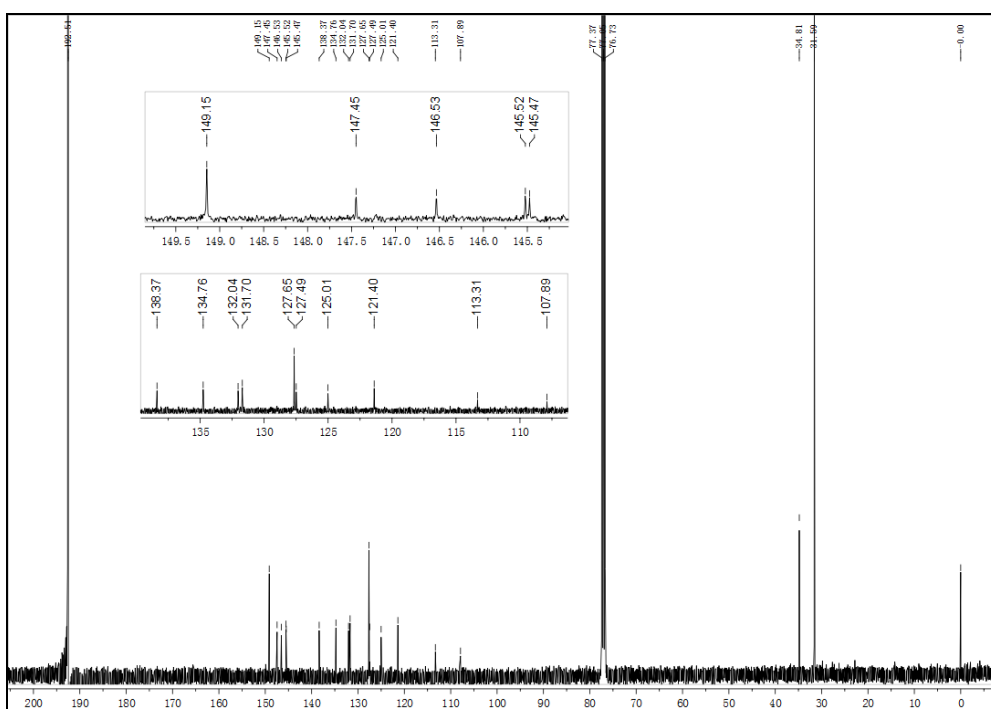

Figure S13.  $^{13}\text{C}$  NMR spectrum of **6** (100 MHz,  $V_{\text{CDCl}_3}/V_{\text{CS}_2} = 4:1$  at  $25^\circ\text{C}$ ,  $\delta(^{13}\text{C}_{\text{CS}_2}) = 192.51$ ).

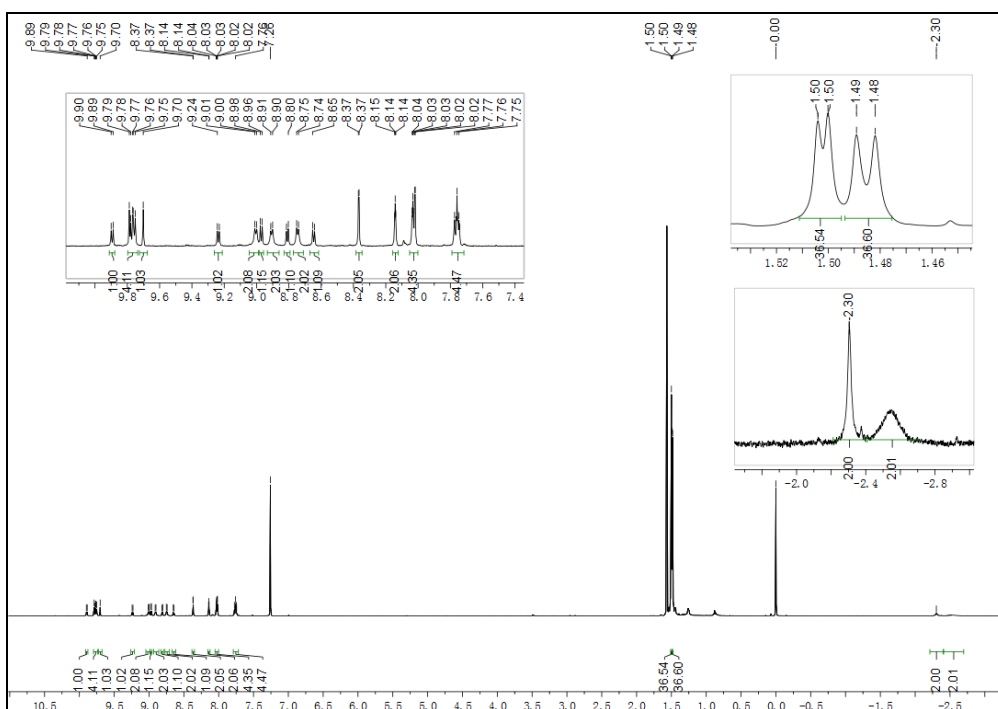

Figure S14.  $^1\text{H}$  NMR spectrum of **7** (400 MHz,  $\text{CDCl}_3$  at  $25^\circ\text{C}$ ).

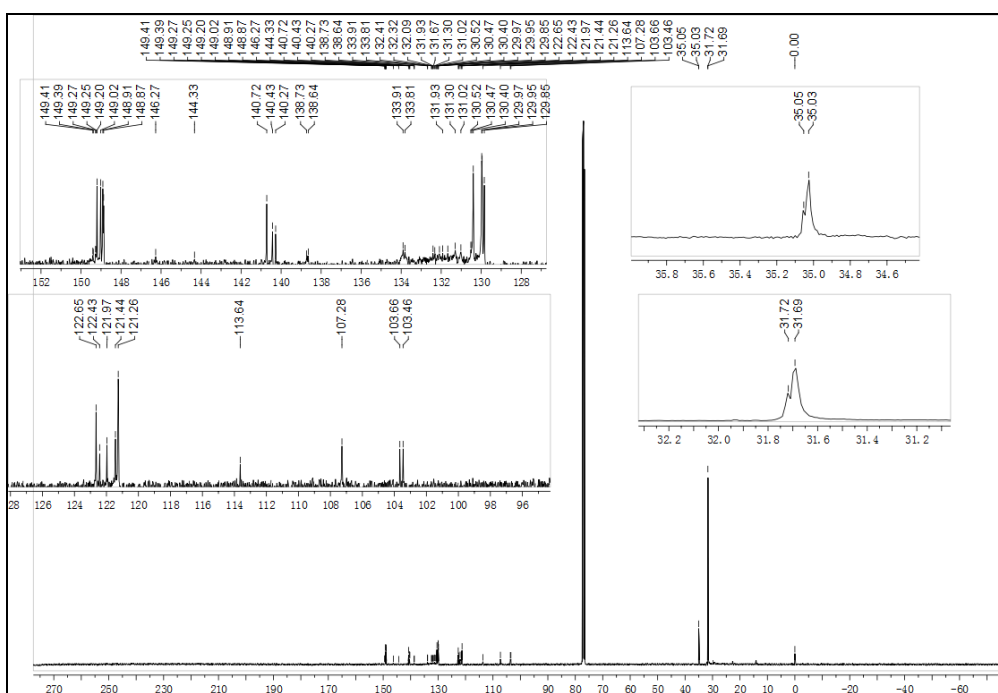

Figure S15.  $^{13}\text{C}$  NMR spectrum of **7** (100 MHz,  $\text{CDCl}_3$  at  $25^\circ\text{C}$ ).

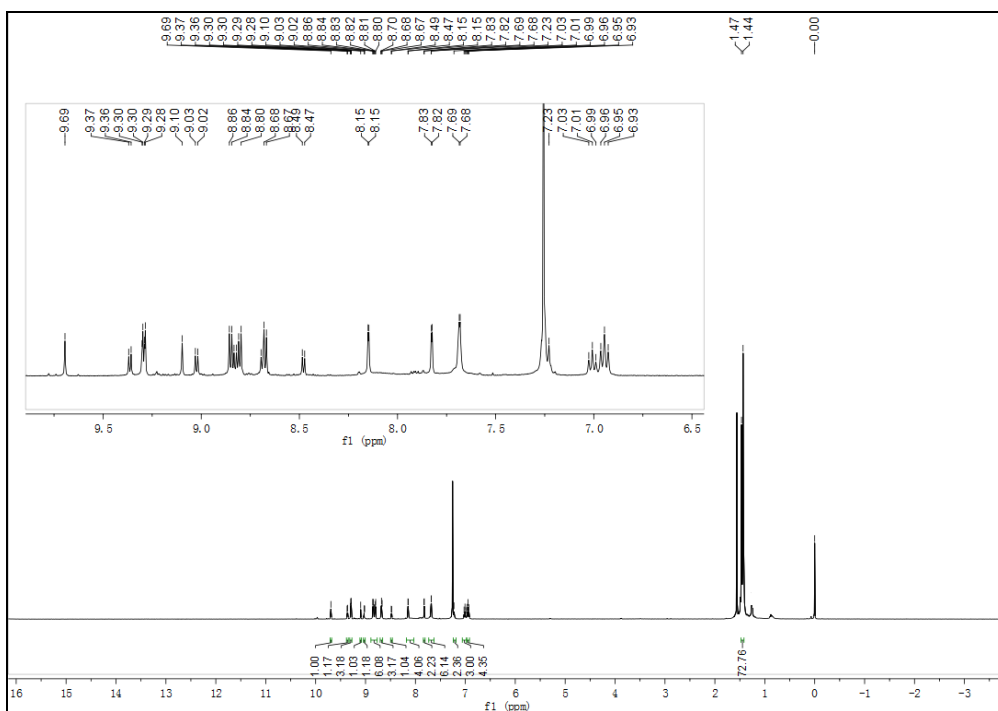

Figure S16.  $^1\text{H}$  NMR spectrum of **8** (400 MHz,  $\text{CDCl}_3$  at  $25^\circ\text{C}$ ).

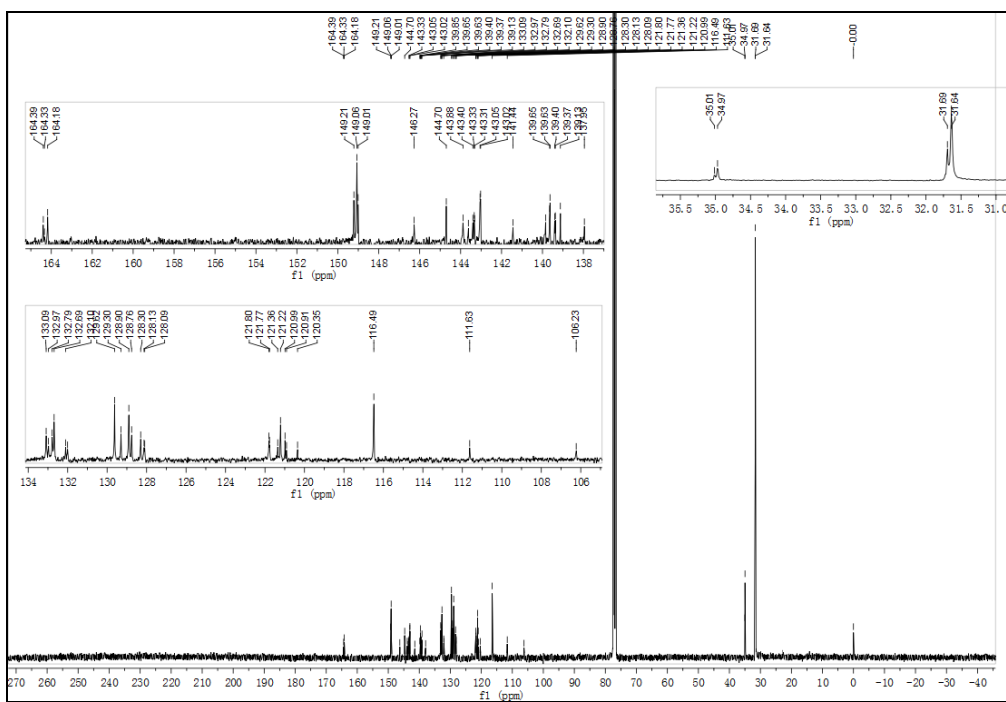

Figure S17.  $^{13}\text{C}$  NMR spectrum of **8** (100 MHz,  $\text{CDCl}_3$  at  $25^\circ\text{C}$ ).

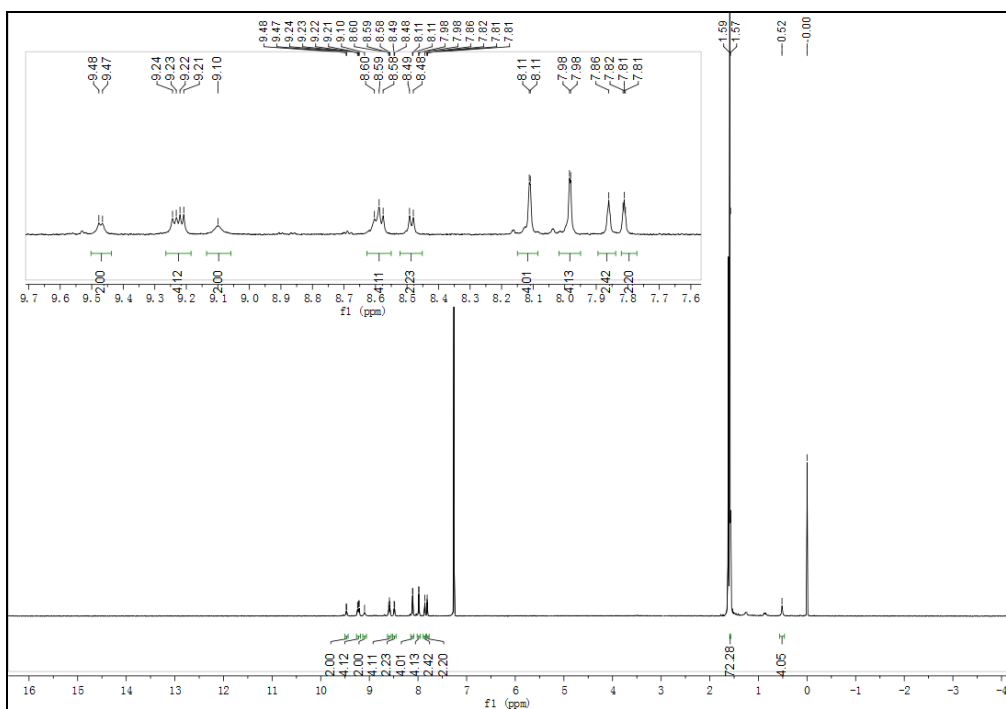

Figure S18.  $^1\text{H}$  NMR spectrum of H4-3 (400 MHz,  $\text{CDCl}_3$  at  $25^\circ\text{C}$ ).

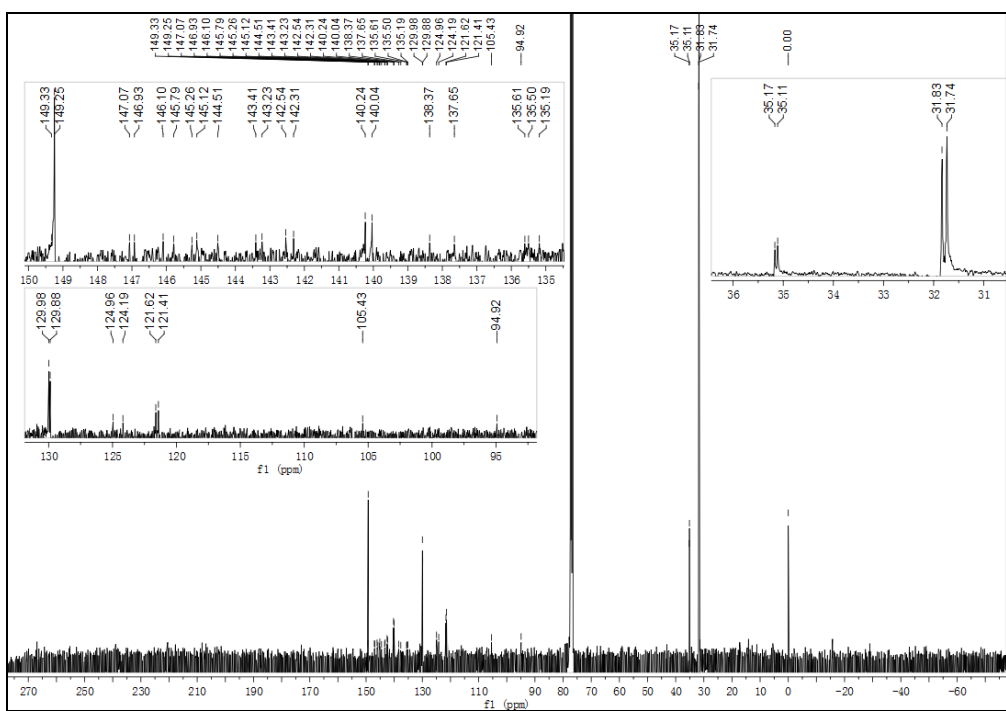

Figure S19.  $^{13}\text{C}$  NMR spectrum of H4-3 (100 MHz,  $\text{CDCl}_3$  at  $25^\circ\text{C}$ ).



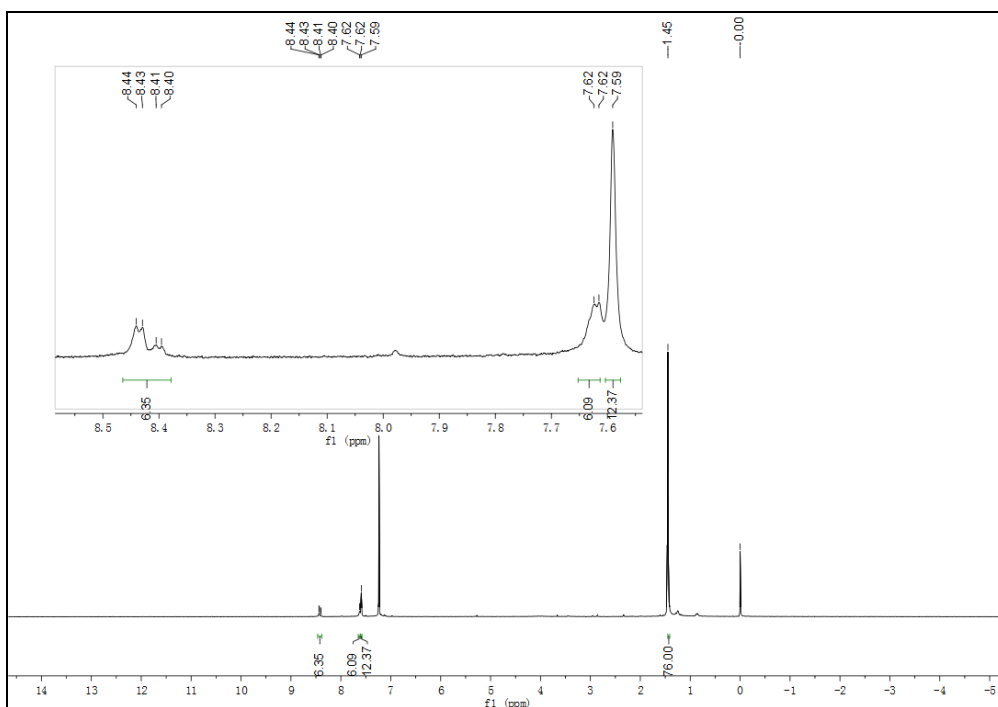

Figure S20.  $^1\text{H}$  NMR spectrum of **H4-6** (400 MHz,  $V_{\text{CDCl}_3}/V_{\text{CS}_2} = 4:1$  at  $25^\circ\text{C}$ ).

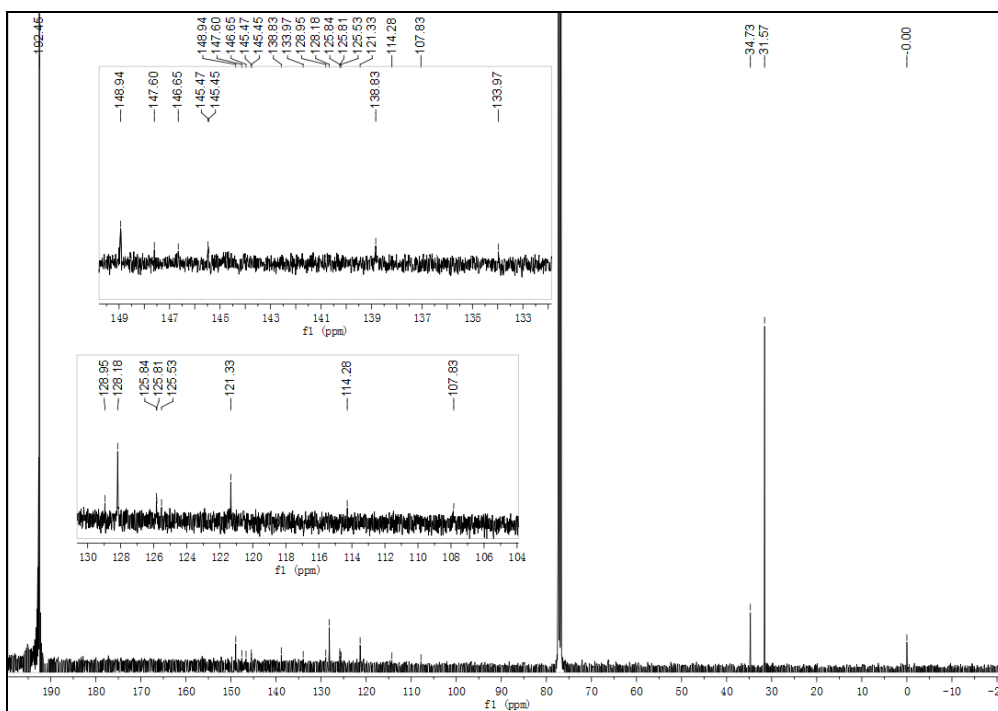

Figure S21.  $^{13}\text{C}$  NMR spectrum of **H4-6** (100 MHz,  $V_{\text{CDCl}_3}/V_{\text{CS}_2} = 4:1$  at  $25^\circ\text{C}$ ,  $\delta(^{13}\text{C}_{\text{CS}_2}) = 192.45$ ).

## 11. Crystal Data for 2

| Compound reference                                                            | <b>2</b>                                                                        |
|-------------------------------------------------------------------------------|---------------------------------------------------------------------------------|
| Chemical formula                                                              | C <sub>96</sub> H <sub>100</sub> Br <sub>2</sub> N <sub>8</sub> Ni <sub>2</sub> |
| Formula Mass                                                                  | 1643.02                                                                         |
| Crystal system                                                                | Monoclinic                                                                      |
| <i>a</i> /Å                                                                   | 38.7(10)                                                                        |
| <i>b</i> /Å                                                                   | 9.0001(13)                                                                      |
| <i>c</i> /Å                                                                   | 33.3200(3)                                                                      |
| <i>α</i> /°                                                                   | 90.00                                                                           |
| <i>β</i> /°                                                                   | 109.69                                                                          |
| <i>γ</i> /°                                                                   | 90.00                                                                           |
| Unit cell volume/Å <sup>3</sup>                                               | 10927                                                                           |
| Temperature/K                                                                 | 273(2)                                                                          |
| Space group                                                                   | <i>P</i> 21/ <i>c</i>                                                           |
| No. of formula units per unit cell, <i>Z</i>                                  | 4                                                                               |
| No. of reflections measured                                                   | 47293                                                                           |
| No. of independent reflections                                                | 19023                                                                           |
| <i>R</i> <sub>int</sub>                                                       | 0.0420                                                                          |
| Final <i>R</i> <sub>I</sub> values ( <i>I</i> > 2σ( <i>I</i> ))               | 0.0994                                                                          |
| Final <i>wR</i> ( <i>F</i> <sup>2</sup> ) values ( <i>I</i> > 2σ( <i>I</i> )) | 0.2754                                                                          |
| Final <i>R</i> <sub>I</sub> values (all data)                                 | 0.1410                                                                          |
| Final <i>wR</i> ( <i>F</i> <sup>2</sup> ) values (all data)                   | 0.3090                                                                          |
